# Supplementary material for: Long noncoding RNA BCYRN1 promotes cardioprotection by enhancing human and murine regulatory T cell dynamics
Source: JCI journal article supplement (doi:10.1172/jci179262), 2025-03-25
Supplement: sd2 [file 2]

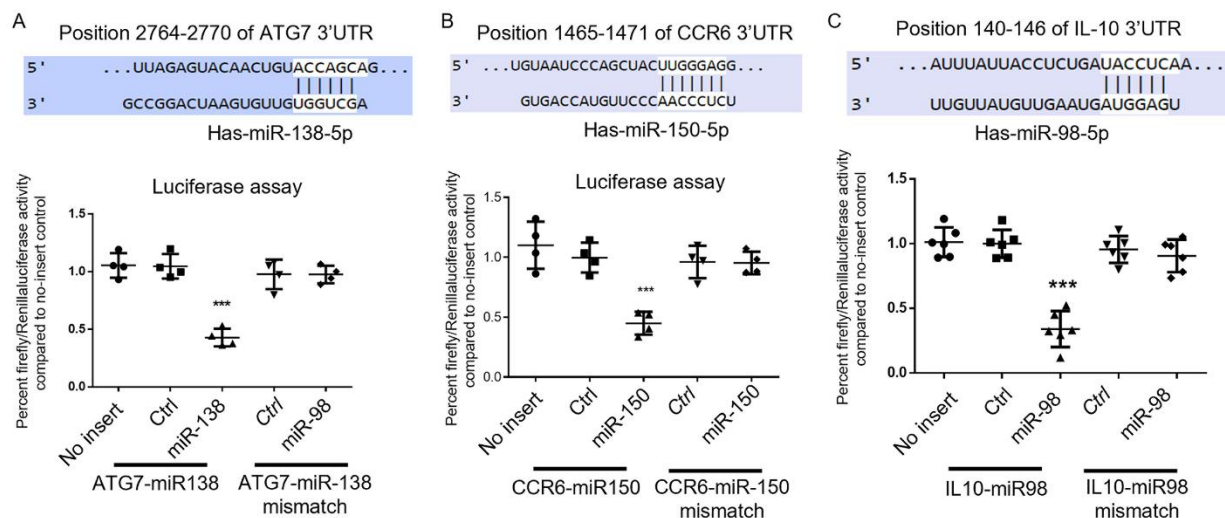

**Figure S1 validation of miR-138, miR-150, and miR-98 target ATG7, CCR6, and IL10.**

(A-C) Co-transfected wild type or mutant luciferase reporters with mimic miR-138 (A), miR-150 (B), and miR-98 (C) into HEK-293T cells, followed by the assessment of relative luciferase activity. One-way ANOVA followed by Bonferroni's post hoc test was used to determine the statistical significance among multiple groups. \*,  $P < 0.05$ , \*\*,  $P < 0.01$ , \*\*\*,  $P < 0.001$  versus control group.

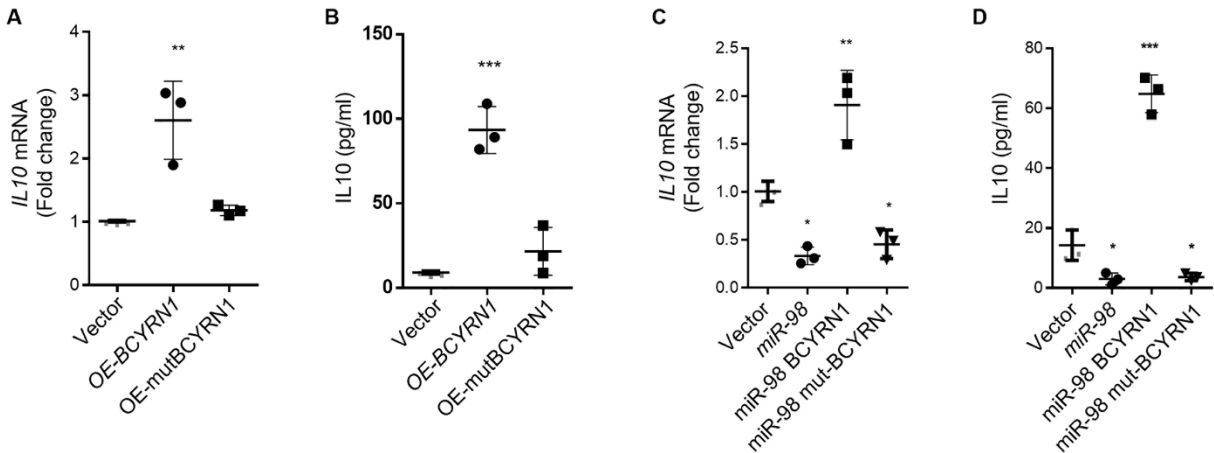

**Figure S2 BCYRN1 construct with a disrupted miR-98 binding site (mut-BCYRN1) no longer suppresses IL10 levels mediated by miR-98.**

(A, B) Human iTreg cells were transfected with Vector, OE-BCYRN1 lenti-vector, or OE-mut-BCYRN1 lenti-vector, followed by assessment of IL10 by qPCR (A) and ELISA (B). (C, D) Co-transfected vector, OE-BCYRN1 lenti-vector, or OE-mut-BCYRN1 lenti-vector with mimic miR-98 into human iTreg cells, followed by assessment of IL10 by qPCR (A) and ELISA (B). One-way ANOVA followed by Bonferroni's post hoc test was used to determine the statistical significance among multiple groups. \*,  $P < 0.05$ , \*\*,  $P < 0.01$ , \*\*\*,  $P < 0.001$  versus vector alone group.

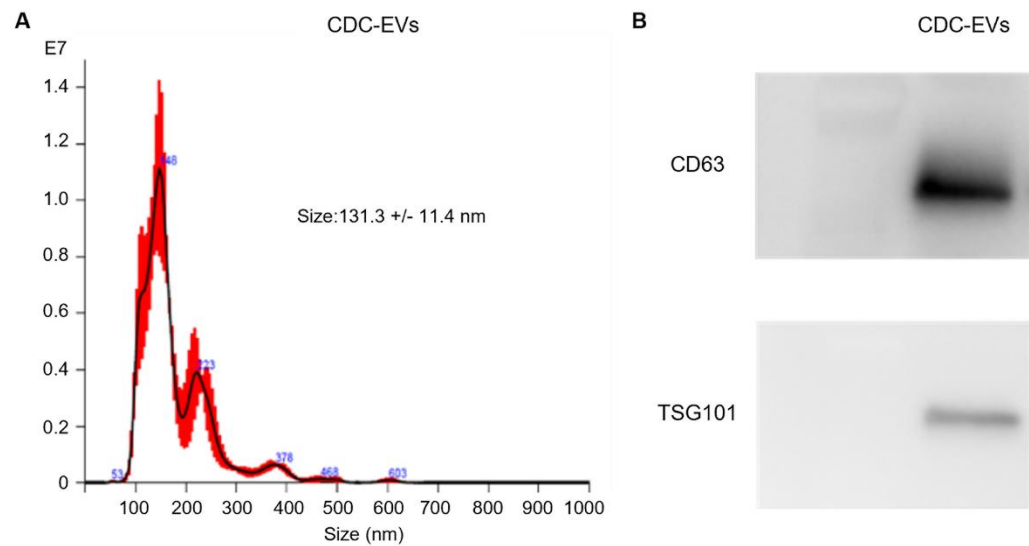

**Figure S3 Characterization of CDC-EVs.**

(A) The particle size distribution of CDC-EVs, as determined by nanoparticle tracking analysis (NTA). (B) Exosome markers CD63 and TSG101 detected by Western blot.

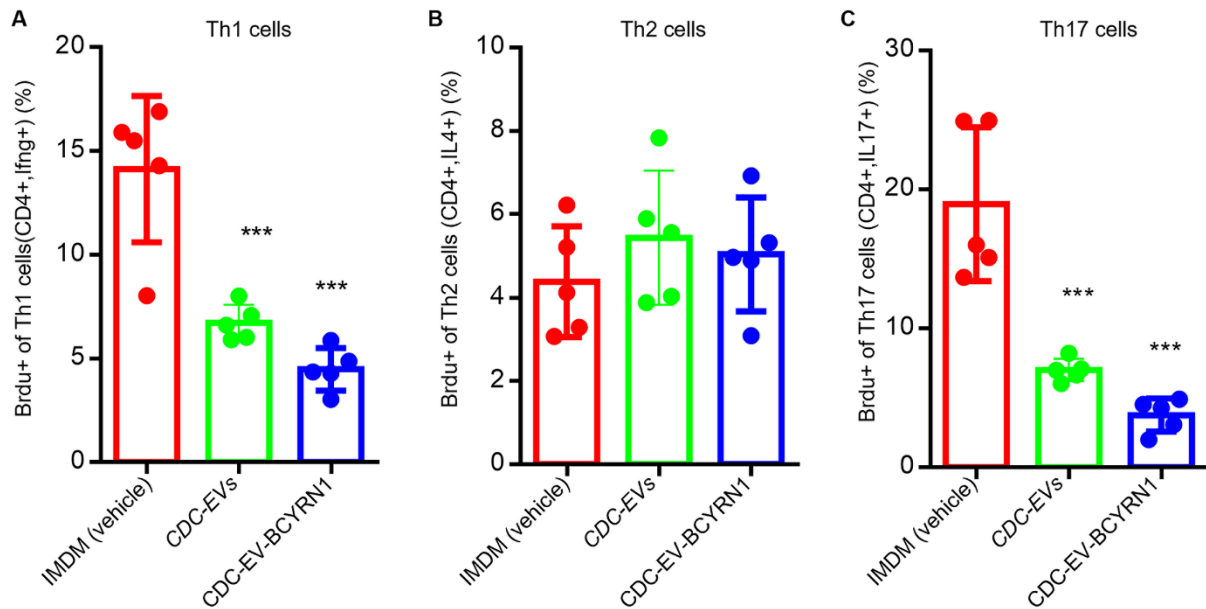

**Figure S4 Enhanced expansion of Tregs could potentially contribute to the suppression of Th1 and Th17 proliferation *in vivo*.**

(A-C) Pooled data of the CD4+IFNγ+BrdU+ (A), CD4+IL4+BrdU+ (B), and CD4+IL17+BrdU+ populations in the heart from CDC-EVs, CDC-EVs overexpressing BCYRN1 (CDC-EVs-BCYRN1)- and IMDM (vehicle)-infused animals (n = 5 mice per group). One-way ANOVA followed by Bonferroni's post hoc test was used to determine the statistical significance among multiple groups. \*, P < 0.05, \*\*, P < 0.01, \*\*\*, P < 0.001 versus IMDM (vehicle) group.

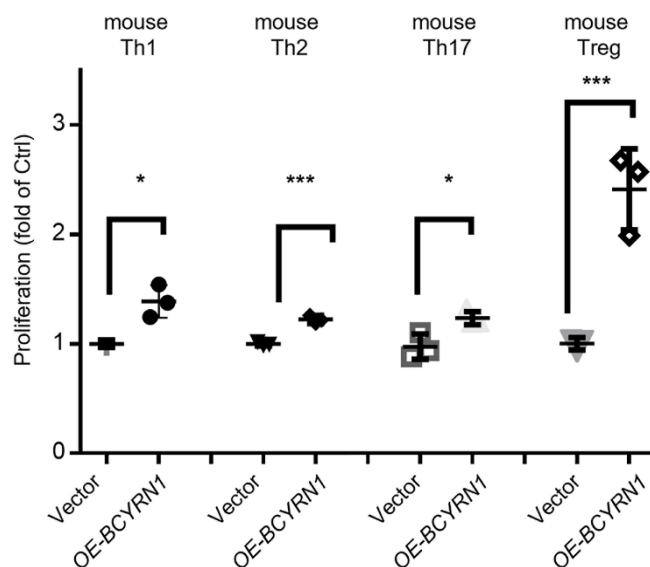

**Figure S5 BCYRN1 overexpression increases the proliferation of Th1, Th2, Th17, and Treg cells.**

Mouse iTreg cells were transfected with Vector, and OE-BCYRN1 lenti-vector, followed by assessment of proliferation using CCK assay. A two-tailed Student's t test was used to determine statistical significance in pairs of indicated groups. \*,  $P < 0.05$ , \*\*,  $P < 0.01$ , \*\*\*,  $P < 0.001$  versus indicated vector group.
